# Supplementary material for: Intrinsic defects and dopants in LiNH2: a first-principles study
Source: Royal Society of Chemistry journal article supplement (doi:10.1039/c0cp01540g), 2011-01-01
Supplement: c0cp01540g.pdf [file c0cp01540g.pdf]

## Electronic Supplementary Information: Intrinsic defects and dopants in LiNH<sub>2</sub>: A first-principles study

E. Hazrati, G. Brocks, B. Buurman, R. A. de Groot, and G. A. de Wijs

TABLE I. Calculated formation energies for point defects and dopants in LiNH<sub>2</sub> at  $E_F=0$ .

| Defect                       | $E_f$ (eV) | Defect                                                         | $E_f$ (eV) | Defect                                                         | $E_f$ (eV) |
|------------------------------|------------|----------------------------------------------------------------|------------|----------------------------------------------------------------|------------|
| Li <sub>i</sub> <sup>+</sup> | -1.98      | Ti <sub>Li</sub> <sup>3+</sup>                                 | -4.20      | (Sc <sub>Li</sub> <sup>+</sup> +V <sub>H</sub> ) <sup>0</sup>  | -1.49      |
| Li <sub>i</sub> <sup>0</sup> | 1.46       | Ti <sub>Li</sub> <sup>2+</sup>                                 | -2.66      | Sc <sub>Li</sub> <sup>0</sup>                                  | 3.24       |
| Li <sub>i</sub> <sup>-</sup> | 4.99       | (Ti <sub>Li</sub> <sup>2+</sup> +V <sub>H</sub> ) <sup>0</sup> | -3.29      | (Sc <sub>Li</sub> <sup>0</sup> +V <sub>H</sub> ) <sup>0</sup>  | 1.99       |
| V <sub>Li</sub> <sup>+</sup> | 2.92       | Ti <sub>Li</sub> <sup>+</sup>                                  | 0.69       | (Sc <sub>Li</sub> <sup>0</sup> +2V <sub>H</sub> ) <sup>0</sup> | 0.66       |
| V <sub>Li</sub> <sup>0</sup> | 2.95       | (Ti <sub>Li</sub> <sup>+</sup> +V <sub>H</sub> ) <sup>0</sup>  | -0.82      | Ca <sub>Li</sub> <sup>+</sup>                                  | -1.52      |
| V <sub>Li</sub> <sup>-</sup> | 3.12       | (Ti <sub>Li</sub> <sup>+</sup> +2V <sub>H</sub> ) <sup>0</sup> | -1.84      | Ca <sub>Li</sub> <sup>0</sup>                                  | 1.95       |
| H <sub>i</sub> <sup>+</sup>  | -1.14      | Ti <sub>Li</sub> <sup>0</sup>                                  | 3.71       | (Ca <sub>Li</sub> <sup>0</sup> +V <sub>H</sub> ) <sup>0</sup>  | 1.12       |
| H <sub>i</sub> <sup>0</sup>  | 2.34       | (Ti <sub>Li</sub> <sup>0</sup> +V <sub>H</sub> ) <sup>0</sup>  | 2.39       | Ca <sub>Li</sub> <sup>-</sup>                                  | 5.32       |
| H <sub>i</sub> <sup>-</sup>  | 3.81       | (Ti <sub>Li</sub> <sup>0</sup> +2V <sub>H</sub> ) <sup>0</sup> | 1.09       | Mg <sub>Li</sub> <sup>+</sup>                                  | -2.62      |
| V <sub>H</sub> <sup>+</sup>  | 2.31       | (Ti <sub>Li</sub> <sup>0</sup> +3V <sub>H</sub> ) <sup>0</sup> | -0.06      | Mg <sub>Li</sub> <sup>0</sup>                                  | 0.90       |
| V <sub>H</sub> <sup>0</sup>  | 2.40       | Sc <sub>Li</sub> <sup>2+</sup>                                 | -3.43      | (Mg <sub>Li</sub> <sup>0</sup> +V <sub>H</sub> ) <sup>0</sup>  | 0.08       |
| V <sub>H</sub> <sup>-</sup>  | 3.24       | Sc <sub>Li</sub> <sup>+</sup>                                  | -0.15      | Mg <sub>Li</sub> <sup>-</sup>                                  | 4.43       |

The calculated atomic coordinates in the cartesian mode (next pages), electronic energies  $E$  (eV) and thermal chemistry corrections (zero-point energy corrections, ZPE) of optimized structures in the proton transfer pathway (Fig. 3). All energies pertain to the full cell, i.e. Li<sub>32</sub>N<sub>32</sub>H<sub>65</sub>.

- (a)  $E = -614.274$  eV, ZPE = 23.525 eV
- (b)  $E = -613.826$  eV, ZPE = 23.394 eV
- (c)  $E = -614.237$  eV, ZPE = 23.525 eV
- (d)  $E = -613.632$  eV, ZPE = 23.394 eV
- (e)  $E = -614.274$  eV, ZPE = 23.525 eV

Three lattice vectors are (in Å):

|         |         |         |
|---------|---------|---------|
| 10.0263 | 0.0000  | 0.0000  |
| 0.0000  | 10.0263 | 0.0000  |
| 0.0000  | 0.0000  | 10.3428 |

TABLE II. The calculated atomic coordinates for local minimum (a). The coordinates of the hydrogen atom making a jump are boldface.

| Atom | x-coord. | y-coord. | z-coord. | Atom | x-coord. | y-coord. | z-coord. | Atom     | x-coord.       | y-coord.       | z-coord.       |
|------|----------|----------|----------|------|----------|----------|----------|----------|----------------|----------------|----------------|
| Li   | 10.01025 | 0.00625  | -0.01814 | N    | 1.40068  | 6.33460  | 6.36571  | H        | 1.66315        | 7.96643        | 9.05237        |
| Li   | 2.56535  | 2.45887  | 5.23454  | N    | 3.69999  | 6.34406  | 3.96900  | H        | 3.31753        | 7.10222        | 9.08870        |
| Li   | 9.54253  | 2.10392  | 2.23576  | N    | 1.25498  | 8.71998  | 3.96520  | H        | 4.58976        | 9.18968        | 6.44279        |
| Li   | 2.57625  | -0.01351 | 7.76281  | N    | 6.15822  | 6.25497  | 1.20787  | H        | 0.49226        | 5.86411        | 6.45058        |
| Li   | 10.00540 | 2.53941  | 10.26556 | N    | 8.86625  | 8.80969  | 1.18986  | H        | 4.26280        | 5.52055        | 3.72585        |
| Li   | 2.53566  | 9.99418  | 10.25465 | N    | 6.23351  | 8.87305  | 9.16488  | H        | 0.80310        | 9.63713        | 3.87392        |
| Li   | 2.53556  | 0.00303  | 5.21806  | N    | 8.79180  | 6.18052  | 9.12504  | H        | 6.15111        | 5.57446        | 1.97960        |
| Li   | 9.86449  | 2.26698  | 5.32461  | N    | 8.62787  | 8.72986  | 6.37055  | H        | 8.85286        | 9.44139        | 2.00106        |
| Li   | 5.01695  | 0.00767  | 0.01454  | N    | 6.37194  | 6.27426  | 6.33739  | H        | 5.56306        | 8.86863        | 8.38451        |
| Li   | 7.46623  | 2.52752  | 5.22210  | N    | 8.80481  | 6.34992  | 3.99215  | H        | 9.46775        | 6.16116        | 8.35026        |
| Li   | 5.03604  | 2.50856  | 2.58885  | N    | 6.29376  | 8.65447  | 3.95865  | H        | 8.62524        | 8.05174        | 7.14379        |
| Li   | 7.48371  | 9.98619  | 7.78165  | H    | 1.31497  | 0.57790  | 1.94192  | H        | 6.37785        | 6.95019        | 7.11331        |
| Li   | 5.02110  | 2.51367  | 0.07582  | H    | 3.92948  | 4.46550  | 1.97675  | H        | 8.22016        | 6.19266        | 3.16144        |
| Li   | 7.50710  | 0.00806  | 10.27055 | H    | 0.60446  | 3.89374  | 8.32594  | H        | 6.98051        | 8.60576        | 3.19352        |
| Li   | 7.43365  | 9.96953  | 5.30140  | H    | 4.46225  | 1.17518  | 8.38502  | H        | 7.06118        | 6.72691        | 1.33931        |
| Li   | 5.02414  | 2.50560  | 5.10713  | H    | 3.57230  | 3.11654  | 7.19458  | H        | 7.94468        | 8.35929        | 1.24408        |
| Li   | 10.01172 | 5.03130  | -0.01300 | H    | 1.32278  | 1.85099  | 7.20333  | H        | 6.68399        | 7.95443        | 9.07697        |
| Li   | 2.49191  | 7.58752  | 5.13268  | H    | 3.17593  | 1.28389  | 3.15844  | H        | 8.35919        | 7.10584        | 9.01771        |
| Li   | 10.00558 | 7.55991  | 2.57833  | H    | 2.13212  | 4.29682  | 3.40088  | H        | 9.52735        | 9.20695        | 6.49757        |
| Li   | 2.50077  | 5.06592  | 7.83872  | H    | 1.97643  | 1.78510  | 1.10383  | H        | 5.46679        | 5.80496        | 6.45820        |
| Li   | 10.00867 | 7.53629  | 0.06550  | H    | 2.97399  | 3.33874  | 1.34883  | H        | 9.39298        | 5.50947        | 4.02767        |
| Li   | 2.50333  | 5.01955  | 10.30914 | H    | 1.73573  | 2.99332  | 9.01889  | H        | 5.84944        | 9.56645        | 3.80007        |
| Li   | 2.74075  | 5.20870  | 5.41910  | H    | 3.32467  | 2.06414  | 9.08193  | <b>H</b> | <b>1.47531</b> | <b>2.85855</b> | <b>3.01662</b> |
| Li   | -0.00295 | 7.57251  | 5.10311  | H    | 4.61165  | 4.11141  | 6.49840  |          |                |                |                |
| Li   | 5.00686  | 5.02697  | 10.34159 | H    | 0.59089  | 0.60572  | 6.50153  |          |                |                |                |
| Li   | 7.52768  | 7.49209  | 5.13956  | H    | 4.27565  | 0.46311  | 3.98562  |          |                |                |                |
| Li   | 5.03600  | 7.55599  | 2.56381  | H    | 0.55554  | 4.03001  | 3.70780  |          |                |                |                |
| Li   | 7.49950  | 5.03983  | 7.74655  | H    | 6.17007  | 0.55313  | 1.96866  |          |                |                |                |
| Li   | 5.00383  | 7.52847  | 0.07544  | H    | 8.86096  | 4.36767  | 1.92803  |          |                |                |                |
| Li   | 7.48839  | 5.09262  | 10.23086 | H    | 5.56926  | 3.87008  | 8.36707  |          |                |                |                |
| Li   | 7.53715  | 5.01286  | 5.22988  | H    | 9.38782  | 1.13958  | 8.29345  |          |                |                |                |
| Li   | 5.02255  | 7.51628  | 5.09564  | H    | 8.70007  | 3.16221  | 7.21719  |          |                |                |                |
| N    | 1.09070  | 1.28130  | 1.22627  | H    | 6.39315  | 1.91100  | 7.18731  |          |                |                |                |
| N    | 3.88475  | 3.78790  | 1.20456  | H    | 7.85718  | 1.32908  | 3.39383  |          |                |                |                |
| N    | 1.23311  | 3.88098  | 9.14054  | H    | 6.94102  | 3.67159  | 3.19385  |          |                |                |                |
| N    | 3.78473  | 1.14964  | 9.15856  | H    | 7.07777  | 1.70189  | 1.30740  |          |                |                |                |
| N    | 3.65553  | 3.75124  | 6.39030  | H    | 7.82422  | 3.43717  | 1.13721  |          |                |                |                |
| N    | 1.35666  | 1.27370  | 6.35298  | H    | 6.70894  | 2.98468  | 9.06710  |          |                |                |                |
| N    | 3.76056  | 1.35129  | 4.00087  | H    | 8.27121  | 2.02986  | 9.02592  |          |                |                |                |
| N    | 1.47732  | 3.58465  | 3.75344  | H    | 9.57355  | 4.24712  | 6.42409  |          |                |                |                |
| N    | 6.16498  | 1.24286  | 1.20560  | H    | 5.41173  | 0.85141  | 6.49640  |          |                |                |                |
| N    | 8.81532  | 3.71024  | 1.13678  | H    | 9.05910  | 0.38197  | 3.89041  |          |                |                |                |
| N    | 6.24633  | 3.89820  | 9.14035  | H    | 5.83488  | 4.56991  | 3.93575  |          |                |                |                |
| N    | 8.78253  | 1.14482  | 9.12475  | H    | 1.11610  | 5.66618  | 2.02031  |          |                |                |                |
| N    | 8.69962  | 3.71311  | 6.34776  | H    | 3.86995  | 9.46403  | 2.00678  |          |                |                |                |
| N    | 6.34230  | 1.27085  | 6.38362  | H    | 0.56790  | 8.91089  | 8.36466  |          |                |                |                |
| N    | 8.71352  | 1.34723  | 3.96686  | H    | 4.43257  | 6.18587  | 8.39100  |          |                |                |                |
| N    | 6.29302  | 3.65332  | 3.99222  | H    | 3.65134  | 8.07724  | 7.11943  |          |                |                |                |
| N    | 1.12760  | 6.26359  | 1.18538  | H    | 1.38206  | 7.00258  | 7.14687  |          |                |                |                |
| N    | 3.85409  | 8.81111  | 1.21185  | H    | 3.09395  | 6.46351  | 3.14623  |          |                |                |                |
| N    | 1.24277  | 8.89939  | 9.14046  | H    | 1.90081  | 8.70905  | 3.16430  |          |                |                |                |
| N    | 3.76319  | 6.18087  | 9.17269  | H    | 2.04152  | 6.72748  | 1.24954  |          |                |                |                |
| N    | 3.66554  | 8.75326  | 6.34414  | H    | 2.94971  | 8.33808  | 1.32685  |          |                |                |                |

TABLE III. The calculated atomic coordinates for local minimum (b). The coordinates of the hydrogen atom making a jump are boldface.

| Atom | x-coord. | y-coord. | z-coord. | Atom | x-coord. | y-coord. | z-coord. | Atom     | x-coord.       | y-coord.       | z-coord.       |
|------|----------|----------|----------|------|----------|----------|----------|----------|----------------|----------------|----------------|
| Li   | 9.98105  | 0.01883  | 0.07182  | N    | 1.36963  | 6.34744  | 6.38392  | H        | 1.54992        | 7.97755        | 9.09688        |
| Li   | 2.51049  | 2.42509  | 5.13288  | N    | 3.70161  | 6.36132  | 3.98115  | H        | 3.27180        | 7.08922        | 9.06961        |
| Li   | 9.43702  | 2.34415  | 2.42516  | N    | 1.25922  | 8.71837  | 3.97482  | H        | 4.58224        | 9.20250        | 6.43651        |
| Li   | 2.54188  | 0.03844  | 7.69824  | N    | 6.15165  | 6.25830  | 1.20239  | H        | 0.44474        | 5.91408        | 6.48953        |
| Li   | 9.92732  | 2.62211  | 10.33264 | N    | 8.86331  | 8.82506  | 1.24161  | H        | 4.21405        | 5.48828        | 3.80657        |
| Li   | 2.75553  | 9.77247  | 10.12317 | N    | 6.26360  | 8.88711  | 9.18972  | H        | 0.79905        | 9.63334        | 3.90686        |
| Li   | 2.52478  | 10.01886 | 5.21472  | N    | 8.80982  | 6.21744  | 9.13211  | H        | 6.13252        | 5.55985        | 1.95776        |
| Li   | 10.00008 | 2.39452  | 5.09303  | N    | 8.65370  | 8.74732  | 6.39437  | H        | 8.82727        | 9.43974        | 2.06470        |
| Li   | 5.09777  | 0.03483  | 0.03703  | N    | 6.38765  | 6.25908  | 6.34924  | H        | 5.61104        | 8.88345        | 8.39446        |
| Li   | 7.50210  | 2.51470  | 5.24639  | N    | 8.81922  | 6.35085  | 4.00492  | H        | 9.49068        | 6.16928        | 8.36268        |
| Li   | 5.04259  | 2.52614  | 2.60308  | N    | 6.29820  | 8.63892  | 3.98643  | H        | 8.66173        | 8.06122        | 7.16028        |
| Li   | 7.52311  | 9.99765  | 7.79791  | H    | 1.30937  | 0.61112  | 1.95732  | H        | 6.37168        | 6.91125        | 7.14496        |
| Li   | 5.03883  | 2.54212  | 0.08032  | H    | 3.95308  | 4.51187  | 1.95527  | H        | 8.20790        | 6.21940        | 3.18915        |
| Li   | 7.53254  | 0.01590  | 10.30946 | H    | 0.56273  | 3.90674  | 8.37459  | H        | 6.99027        | 8.59832        | 3.22588        |
| Li   | 7.45962  | 9.98652  | 5.31809  | H    | 4.49038  | 1.16759  | 8.39506  | H        | 7.05437        | 6.72341        | 1.35656        |
| Li   | 5.02399  | 2.47634  | 5.11409  | H    | 3.50982  | 3.10084  | 7.11963  | H        | 7.95179        | 8.35362        | 1.27692        |
| Li   | 10.00898 | 5.07842  | 10.35018 | H    | 1.31612  | 1.93620  | 7.12702  | H        | 6.71481        | 7.96810        | 9.11563        |
| Li   | 2.50101  | 7.58269  | 5.15117  | H    | 3.19169  | 1.25465  | 3.15442  | H        | 8.37383        | 7.13474        | 8.98087        |
| Li   | 10.02343 | 7.54587  | 2.61192  | H    | 2.20076  | 3.64981  | 3.31516  | H        | 9.56815        | 9.20291        | 6.49675        |
| Li   | 2.47178  | 5.05964  | 7.80619  | H    | 1.93920  | 1.73970  | 0.97793  | H        | 5.49928        | 5.75517        | 6.45474        |
| Li   | 9.97355  | 7.55031  | 0.10740  | H    | 2.99941  | 3.35597  | 1.39042  | H        | 9.39420        | 5.49925        | 4.01565        |
| Li   | 2.50618  | 5.01409  | 10.30649 | H    | 1.69500  | 2.98757  | 9.03565  | H        | 5.85917        | 9.55469        | 3.83628        |
| Li   | 2.61088  | 5.18756  | 5.34474  | H    | 3.33171  | 2.03347  | 9.09002  | <b>H</b> | <b>1.23422</b> | <b>2.35441</b> | <b>2.52318</b> |
| Li   | 0.00300  | 7.56806  | 5.11495  | H    | 4.50656  | 4.13824  | 6.41246  |          |                |                |                |
| Li   | 5.00208  | 5.03563  | 10.32224 | H    | 0.46739  | 0.75474  | 6.45279  |          |                |                |                |
| Li   | 7.53934  | 7.49253  | 5.17118  | H    | 4.29153  | 0.42359  | 3.97694  |          |                |                |                |
| Li   | 5.04400  | 7.52947  | 2.59925  | H    | 0.65893  | 4.03386  | 3.36175  |          |                |                |                |
| Li   | 7.55505  | 5.02244  | 7.72341  | H    | 6.18951  | 0.60368  | 1.99726  |          |                |                |                |
| Li   | 5.01060  | 7.52957  | 0.07808  | H    | 8.78392  | 4.51365  | 1.90264  |          |                |                |                |
| Li   | 7.47641  | 5.13641  | 10.20426 | H    | 5.59798  | 3.89393  | 8.33418  |          |                |                |                |
| Li   | 7.56701  | 5.00465  | 5.22940  | H    | 9.44561  | 1.15499  | 8.37822  |          |                |                |                |
| Li   | 5.02667  | 7.49781  | 5.11803  | H    | 8.79262  | 3.10670  | 7.15577  |          |                |                |                |
| N    | 1.09775  | 1.51839  | 1.52259  | H    | 6.38801  | 1.93683  | 7.21507  |          |                |                |                |
| N    | 3.90234  | 3.80554  | 1.20908  | H    | 7.80031  | 1.21785  | 3.38378  |          |                |                |                |
| N    | 1.20563  | 3.87969  | 9.17829  | H    | 6.94043  | 3.65941  | 3.22118  |          |                |                |                |
| N    | 3.81040  | 1.12841  | 9.16499  | H    | 7.10070  | 1.73455  | 1.31033  |          |                |                |                |
| N    | 3.56206  | 3.74420  | 6.31974  | H    | 7.75936  | 3.53706  | 1.14752  |          |                |                |                |
| N    | 1.35297  | 1.26428  | 6.34910  | H    | 6.72239  | 3.00286  | 9.05302  |          |                |                |                |
| N    | 3.78711  | 1.31727  | 3.98896  | H    | 8.28570  | 2.02718  | 9.06436  |          |                |                |                |
| N    | 1.28707  | 3.24370  | 3.56334  | H    | 9.64287  | 4.22478  | 6.38325  |          |                |                |                |
| N    | 6.19189  | 1.26808  | 1.21163  | H    | 5.43602  | 0.83565  | 6.54703  |          |                |                |                |
| N    | 8.75290  | 3.80046  | 1.16078  | H    | 9.08534  | 0.40169  | 3.89789  |          |                |                |                |
| N    | 6.25195  | 3.91217  | 9.12767  | H    | 5.83932  | 4.56794  | 3.95725  |          |                |                |                |
| N    | 8.83136  | 1.16824  | 9.20280  | H    | 1.22142  | 5.68039  | 2.01635  |          |                |                |                |
| N    | 8.74387  | 3.73045  | 6.33905  | H    | 3.96671  | 9.50490  | 1.98852  |          |                |                |                |
| N    | 6.35667  | 1.27501  | 6.42811  | H    | 0.57614  | 9.05794  | 8.42850  |          |                |                |                |
| N    | 8.63528  | 1.32178  | 3.97746  | H    | 4.41086  | 6.20275  | 8.37103  |          |                |                |                |
| N    | 6.29353  | 3.64933  | 4.02099  | H    | 3.65911  | 8.09815  | 7.14656  |          |                |                |                |
| N    | 1.13842  | 6.28862  | 1.19243  | H    | 1.38821  | 7.03074  | 7.15152  |          |                |                |                |
| N    | 3.87945  | 8.82304  | 1.22290  | H    | 3.06557  | 6.41536  | 3.17412  |          |                |                |                |
| N    | 1.22745  | 8.94642  | 9.21557  | H    | 1.90737  | 8.72942  | 3.17646  |          |                |                |                |
| N    | 3.75229  | 6.18620  | 9.16173  | H    | 2.03916  | 6.78119  | 1.18373  |          |                |                |                |
| N    | 3.65703  | 8.76365  | 6.36235  | H    | 3.01167  | 8.32940  | 1.46515  |          |                |                |                |

TABLE IV. The calculated atomic coordinates for local minimum (c). The coordinates of the hydrogen atoms making a jump are boldface.

| Atom | x-coord. | y-coord. | z-coord. | Atom     | x-coord.       | y-coord.       | z-coord.       | Atom     | x-coord.       | y-coord.       | z-coord.       |
|------|----------|----------|----------|----------|----------------|----------------|----------------|----------|----------------|----------------|----------------|
| Li   | 10.01617 | 9.98590  | 10.23514 | N        | 1.39662        | 6.31317        | 6.35819        | H        | 1.57220        | 7.86222        | 8.96955        |
| Li   | 2.50328  | 2.52758  | 5.21895  | N        | 3.74961        | 6.36862        | 3.95383        | H        | 3.33140        | 7.08986        | 9.06070        |
| Li   | 9.62981  | 2.91640  | 2.95435  | N        | 1.26651        | 8.69708        | 3.96475        | H        | 4.60540        | 9.18542        | 6.43079        |
| Li   | 2.54989  | 9.99501  | 7.68575  | N        | 6.17878        | 6.23953        | 1.20914        | H        | 0.48399        | 5.85751        | 6.47338        |
| Li   | 9.66890  | 2.77718  | 9.98204  | N        | 8.91651        | 8.83447        | 1.18262        | H        | 4.21667        | 5.46032        | 3.84600        |
| Li   | 2.66673  | 9.72803  | 10.10425 | N        | 6.25198        | 8.85782        | 9.17262        | H        | 0.78305        | 9.60279        | 3.95180        |
| Li   | 2.54027  | 0.01746  | 5.22555  | N        | 8.78238        | 6.19937        | 9.14860        | H        | 6.17613        | 5.58525        | 2.00316        |
| Li   | 0.00366  | 2.51543  | 5.27865  | N        | 8.66091        | 8.73498        | 6.35053        | H        | 8.90872        | 9.45671        | 2.00100        |
| Li   | 5.07229  | 0.00734  | 0.03510  | N        | 6.36706        | 6.30518        | 6.35047        | H        | 5.55957        | 8.87534        | 8.41137        |
| Li   | 7.50404  | 2.53231  | 5.24931  | N        | 8.76242        | 6.38183        | 3.94869        | H        | 9.42070        | 6.15002        | 8.34338        |
| Li   | 5.03790  | 2.52610  | 2.60596  | N        | 6.28982        | 8.68656        | 3.96044        | H        | 8.69502        | 8.05301        | 7.12007        |
| Li   | 7.47903  | 9.90368  | 7.72802  | <b>H</b> | <b>1.07247</b> | <b>0.62427</b> | <b>2.07682</b> | H        | 6.37130        | 6.98927        | 7.11887        |
| Li   | 5.01459  | 2.51175  | 0.07555  | H        | 3.83483        | 4.40808        | 1.99680        | H        | 8.07570        | 6.39415        | 3.18295        |
| Li   | 7.53901  | 9.98933  | 10.29095 | H        | 0.72816        | 3.90580        | 8.20944        | H        | 6.94053        | 8.71838        | 3.16447        |
| Li   | 7.50608  | 0.00298  | 5.24714  | H        | 4.45420        | 1.12720        | 8.38719        | H        | 7.07390        | 6.72969        | 1.32417        |
| Li   | 5.01137  | 2.51159  | 5.12411  | H        | 3.64511        | 3.10156        | 7.18776        | H        | 8.02222        | 8.33750        | 1.27662        |
| Li   | 0.04975  | 5.10757  | 10.29173 | H        | 1.35381        | 1.86062        | 7.22384        | H        | 6.67034        | 7.92504        | 9.07463        |
| Li   | 2.51870  | 7.53746  | 5.13074  | H        | 3.08215        | 1.45804        | 3.20507        | H        | 8.36545        | 7.13180        | 9.04200        |
| Li   | 0.02033  | 7.53629  | 2.58349  | H        | 1.84997        | 3.66923        | 3.26175        | H        | 9.56869        | 9.20710        | 6.43164        |
| Li   | 2.55872  | 5.08394  | 7.75527  | H        | 2.34916        | 1.22211        | 1.25443        | H        | 5.44578        | 5.86217        | 6.44962        |
| Li   | 0.00063  | 7.53772  | 0.06956  | H        | 2.93246        | 3.28916        | 1.29376        | H        | 9.21622        | 5.46869        | 3.82830        |
| Li   | 2.52795  | 5.01948  | 10.27604 | H        | 1.73785        | 3.02019        | 9.08805        | H        | 5.80518        | 9.58933        | 3.89269        |
| Li   | 2.56965  | 5.05257  | 5.27117  | H        | 3.27629        | 1.96476        | 9.08588        | <b>H</b> | <b>0.95724</b> | <b>2.06412</b> | <b>1.29821</b> |
| Li   | 10.02579 | 7.51734  | 5.08610  | H        | 4.59399        | 4.18414        | 6.48230        |          |                |                |                |
| Li   | 5.00041  | 5.01315  | 0.02958  | H        | 0.49073        | 0.73287        | 6.47696        |          |                |                |                |
| Li   | 7.51758  | 7.53026  | 5.14203  | H        | 4.16465        | 0.46667        | 3.85253        |          |                |                |                |
| Li   | 5.04840  | 7.50334  | 2.60238  | H        | 0.87997        | 4.67109        | 4.05127        |          |                |                |                |
| Li   | 7.47348  | 5.06043  | 7.74014  | H        | 6.22786        | 0.61506        | 1.99874        |          |                |                |                |
| Li   | 5.01589  | 7.50870  | 0.09017  | H        | 8.95926        | 4.63187        | 1.76966        |          |                |                |                |
| Li   | 7.46950  | 5.10009  | 10.22829 | H        | 5.58209        | 3.86467        | 8.36584        |          |                |                |                |
| Li   | 7.52801  | 5.03873  | 5.24421  | H        | 9.34134        | 1.13110        | 8.24372        |          |                |                |                |
| Li   | 5.02012  | 7.52122  | 5.08544  | H        | 8.70459        | 3.19694        | 7.25873        |          |                |                |                |
| N    | 1.32904  | 1.11060  | 1.20977  | H        | 6.36660        | 1.92153        | 7.19030        |          |                |                |                |
| N    | 3.83982  | 3.75832  | 1.19890  | H        | 8.04160        | 1.28262        | 3.25982        |          |                |                |                |
| N    | 1.19679  | 3.89234  | 9.12552  | H        | 6.93564        | 3.65713        | 3.20326        |          |                |                |                |
| N    | 3.78860  | 1.07932  | 9.16975  | H        | 7.10876        | 1.72847        | 1.25360        |          |                |                |                |
| N    | 3.66389  | 3.75731  | 6.39562  | H        | 7.96092        | 3.45371        | 1.32134        |          |                |                |                |
| N    | 1.36905  | 1.25821  | 6.38999  | H        | 6.72472        | 3.00117        | 9.09225        |          |                |                |                |
| N    | 3.73894  | 1.39102  | 3.99129  | H        | 8.03616        | 1.79926        | 8.89698        |          |                |                |                |
| N    | 1.18949  | 3.69063  | 4.05123  | H        | 9.54266        | 4.30601        | 6.45515        |          |                |                |                |
| N    | 6.19833  | 1.25775  | 1.19561  | H        | 5.43985        | 0.82434        | 6.48335        |          |                |                |                |
| N    | 8.92908  | 3.77722  | 1.19426  | H        | 9.28530        | 0.55926        | 3.96797        |          |                |                |                |
| N    | 6.22965  | 3.89668  | 9.16401  | H        | 5.84936        | 4.58274        | 3.93379        |          |                |                |                |
| N    | 8.79570  | 1.14268  | 9.11549  | H        | 1.20796        | 5.63558        | 1.98861        |          |                |                |                |
| N    | 8.66591  | 3.77352  | 6.40825  | H        | 3.99382        | 9.46309        | 1.99259        |          |                |                |                |
| N    | 6.37086  | 1.25187  | 6.40943  | H        | 0.58506        | 8.92347        | 8.29727        |          |                |                |                |
| N    | 8.72991  | 1.42106  | 4.01224  | H        | 4.47445        | 6.17294        | 8.40552        |          |                |                |                |
| N    | 6.29366  | 3.65951  | 4.00647  | H        | 3.66573        | 8.07259        | 7.10191        |          |                |                |                |
| N    | 1.16112  | 6.26833  | 1.17946  | H        | 1.39161        | 7.01510        | 7.10958        |          |                |                |                |
| N    | 3.86644  | 8.80426  | 1.21236  | H        | 3.08759        | 6.37267        | 3.16635        |          |                |                |                |
| N    | 1.23388  | 8.82497  | 9.08850  | H        | 1.91820        | 8.76531        | 3.17264        |          |                |                |                |
| N    | 3.78865  | 6.17720  | 9.17266  | H        | 2.07120        | 6.74167        | 1.20587        |          |                |                |                |
| N    | 3.67682  | 8.75757  | 6.33415  | H        | 3.00586        | 8.31113        | 1.47840        |          |                |                |                |

TABLE V. The calculated atomic coordinates for local minimum (d). The coordinates of the hydrogen atom making a jump are boldface.

| Atom | x-coord. | y-coord. | z-coord. | Atom | x-coord. | y-coord. | z-coord. | Atom     | x-coord.       | y-coord.        | z-coord.       |
|------|----------|----------|----------|------|----------|----------|----------|----------|----------------|-----------------|----------------|
| Li   | 0.02487  | 9.91385  | 0.02599  | N    | 1.41969  | 6.37560  | 6.30898  | H        | 1.71876        | 7.95232         | 8.99047        |
| Li   | 2.54181  | 2.57741  | 5.20142  | N    | 3.78501  | 6.40652  | 3.94666  | H        | 3.39506        | 7.11230         | 9.10410        |
| Li   | 9.74273  | 2.94075  | 2.90626  | N    | 1.42743  | 8.99988  | 3.65581  | H        | 4.51257        | 9.32444         | 6.38009        |
| Li   | 2.51170  | 0.01746  | 7.73871  | N    | 6.21641  | 6.20873  | 1.20628  | H        | 0.67323        | 5.70507         | 6.53074        |
| Li   | 9.97563  | 2.64350  | 10.24210 | N    | 8.79320  | 8.67792  | 1.12092  | H        | 4.29159        | 5.51363         | 3.91694        |
| Li   | 2.55084  | 9.90156  | 10.31787 | N    | 6.28367  | 8.92240  | 9.11082  | H        | 0.41798        | 8.91911         | 3.84267        |
| Li   | 2.47738  | 0.09040  | 5.15123  | N    | 8.75750  | 6.15619  | 9.09936  | H        | 6.12941        | 5.52735         | 1.97219        |
| Li   | 0.03426  | 2.62613  | 5.26941  | N    | 8.70636  | 8.75649  | 6.36025  | H        | 8.77638        | 9.28982         | 1.94797        |
| Li   | 5.04923  | -0.00641 | 0.01321  | N    | 6.32889  | 6.33467  | 6.35744  | H        | 5.58466        | 8.94299         | 8.35616        |
| Li   | 7.54918  | 2.56317  | 5.18529  | N    | 8.75081  | 6.40674  | 3.96741  | H        | 9.33429        | 6.16174         | 8.24846        |
| Li   | 5.03885  | 2.51749  | 2.59962  | N    | 6.34421  | 8.72391  | 3.97035  | H        | 8.70846        | 8.20214         | 7.22741        |
| Li   | 7.52620  | 10.04861 | 7.73756  | H    | 0.34359  | 1.06383  | 1.89585  | H        | 6.34450        | 6.98928         | 7.15067        |
| Li   | 5.03045  | 2.48892  | 0.08785  | H    | 3.69887  | 4.31099  | 2.02805  | H        | 7.92592        | 6.41422         | 3.35128        |
| Li   | 7.53190  | 0.03351  | 10.25976 | H    | 0.67242  | 3.85629  | 8.26653  | H        | 6.98674        | 8.71879         | 3.16729        |
| Li   | 7.57465  | 0.06425  | 5.22623  | H    | 4.42740  | 1.12927  | 8.39893  | H        | 7.14071        | 6.62213         | 1.37798        |
| Li   | 5.05170  | 2.57578  | 5.10914  | H    | 3.66351  | 3.10126  | 7.14957  | H        | 7.82879        | 8.32702         | 1.08094        |
| Li   | 0.01745  | 5.05399  | 10.24550 | H    | 1.38615  | 1.92259  | 7.20655  | H        | 6.72270        | 8.00362         | 8.98076        |
| Li   | 2.57017  | 7.57902  | 5.10184  | H    | 3.13777  | 1.37142  | 3.22430  | H        | 8.27589        | 7.06158         | 9.04952        |
| Li   | 9.72046  | 7.25142  | 2.31612  | H    | 1.88720  | 3.70572  | 3.25221  | H        | 9.60181        | 9.25718         | 6.41314        |
| Li   | 2.62705  | 5.07618  | 7.77734  | H    | 1.90255  | 1.43426  | 1.72049  | H        | 5.38781        | 5.92890         | 6.42329        |
| Li   | 9.99748  | 7.49932  | 10.26609 | H    | 2.96632  | 3.16204  | 1.16911  | H        | 9.11170        | 5.45027         | 3.85970        |
| Li   | 2.52744  | 5.02903  | 10.28045 | H    | 1.81521  | 3.03100  | 9.02400  | H        | 5.84752        | 9.61496         | 3.85603        |
| Li   | 2.62189  | 5.08594  | 5.24550  | H    | 3.31948  | 2.03350  | 9.11973  | <b>H</b> | <b>1.40905</b> | <b>-0.16745</b> | <b>2.63377</b> |
| Li   | 9.85898  | 7.31052  | 5.34170  | H    | 4.64148  | 4.20323  | 6.51748  |          |                |                 |                |
| Li   | 5.00416  | 4.99255  | 0.04407  | H    | 0.44865  | 0.85849  | 6.46001  |          |                |                 |                |
| Li   | 7.47158  | 7.59552  | 5.20813  | H    | 4.25071  | 0.52238  | 3.99291  |          |                |                 |                |
| Li   | 5.09888  | 7.53879  | 2.57183  | H    | 0.93548  | 4.76269  | 3.99360  |          |                |                 |                |
| Li   | 7.41683  | 5.02546  | 7.75175  | H    | 6.17203  | 0.58738  | 1.98690  |          |                |                 |                |
| Li   | 5.10028  | 7.51335  | 0.07352  | H    | 8.88978  | 4.60539  | 1.79608  |          |                |                 |                |
| Li   | 7.47744  | 5.03196  | 10.22034 | H    | 5.52866  | 3.83667  | 8.39506  |          |                |                 |                |
| Li   | 7.44827  | 5.03262  | 5.27243  | H    | 9.50243  | 1.13022  | 8.38932  |          |                |                 |                |
| Li   | 5.02586  | 7.60051  | 5.07323  | H    | 8.67295  | 3.19928  | 7.22776  |          |                |                 |                |
| N    | 1.23968  | 0.66029  | 1.58508  | H    | 6.41563  | 2.00118  | 7.14891  |          |                |                 |                |
| N    | 3.81415  | 3.74340  | 1.17852  | H    | 8.18340  | 1.21854  | 3.23015  |          |                |                 |                |
| N    | 1.25827  | 3.88977  | 9.11163  | H    | 6.98184  | 3.63075  | 3.17435  |          |                |                 |                |
| N    | 3.76739  | 1.11256  | 9.18882  | H    | 7.11131  | 1.71002  | 1.33190  |          |                |                 |                |
| N    | 3.70262  | 3.80376  | 6.39837  | H    | 8.00429  | 3.37814  | 1.24955  |          |                |                 |                |
| N    | 1.35697  | 1.32993  | 6.36644  | H    | 6.68543  | 2.94498  | 9.05880  |          |                |                 |                |
| N    | 3.79185  | 1.44111  | 4.01203  | H    | 8.32669  | 2.00429  | 9.05038  |          |                |                 |                |
| N    | 1.23606  | 3.78099  | 4.04676  | H    | 9.47923  | 4.38330  | 6.49857  |          |                |                 |                |
| N    | 6.20436  | 1.24758  | 1.19866  | H    | 5.51338  | 0.86754  | 6.46512  |          |                |                 |                |
| N    | 8.94778  | 3.77974  | 1.18319  | H    | 9.51061  | 0.71355  | 3.99503  |          |                |                 |                |
| N    | 6.22182  | 3.85629  | 9.15449  | H    | 5.87264  | 4.60620  | 3.79511  |          |                |                 |                |
| N    | 8.89233  | 1.16179  | 9.21678  | H    | 1.27204  | 5.58100  | 1.92270  |          |                |                 |                |
| N    | 8.63678  | 3.80634  | 6.39890  | H    | 3.94994  | 9.43669  | 1.98798  |          |                |                 |                |
| N    | 6.43084  | 1.32038  | 6.37762  | H    | 0.61172  | 8.89291  | 8.30953  |          |                |                 |                |
| N    | 8.80750  | 1.46024  | 4.01109  | H    | 4.50415  | 6.18257  | 8.41125  |          |                |                 |                |
| N    | 6.32746  | 3.70127  | 3.96480  | H    | 3.67253  | 8.15144  | 7.08673  |          |                |                 |                |
| N    | 1.09739  | 6.25023  | 1.16199  | H    | 1.42882  | 6.99190  | 7.13218  |          |                |                 |                |
| N    | 3.96646  | 8.76470  | 1.20904  | H    | 3.21329  | 6.36181  | 3.09317  |          |                |                 |                |
| N    | 1.23055  | 8.84529  | 9.12938  | H    | 1.66042  | 8.14934  | 3.12324  |          |                |                 |                |
| N    | 3.81855  | 6.17974  | 9.17871  | H    | 1.94592  | 6.82752  | 1.15544  |          |                |                 |                |
| N    | 3.62853  | 8.80945  | 6.29674  | H    | 3.08314  | 8.26259  | 1.35059  |          |                |                 |                |

TABLE VI. The calculated atomic coordinates for local minimum (e). The coordinates of the hydrogen atom making a jump are boldface.

| Atom | x-coord. | y-coord. | z-coord. | Atom | x-coord. | y-coord. | z-coord. | Atom     | x-coord.       | y-coord.       | z-coord.       |
|------|----------|----------|----------|------|----------|----------|----------|----------|----------------|----------------|----------------|
| Li   | 10.02017 | 0.02143  | 10.32034 | N    | 1.36615  | 6.30458  | 6.36890  | H        | 1.75916        | 8.00781        | 9.04534        |
| Li   | 2.49494  | 2.57582  | 5.14573  | N    | 3.75413  | 6.37400  | 4.00342  | H        | 3.34816        | 7.08348        | 9.08515        |
| Li   | 10.00655 | 2.55180  | 2.57725  | N    | 1.51156  | 8.69211  | 3.81321  | H        | 4.65133        | 9.10940        | 6.52570        |
| Li   | 2.52800  | 0.04910  | 7.84392  | N    | 6.17399  | 6.25873  | 1.22065  | H        | 0.62290        | 5.61870        | 6.54862        |
| Li   | 10.01803 | 2.52862  | 0.06295  | N    | 8.83071  | 8.73373  | 1.14331  | H        | 4.25116        | 5.47645        | 3.95934        |
| Li   | 2.51060  | 0.01841  | 10.31466 | N    | 6.24801  | 8.91805  | 9.15272  | H        | 0.55630        | 9.06013        | 3.84354        |
| Li   | 2.78042  | 0.18826  | 5.42272  | N    | 8.78905  | 6.17067  | 9.13510  | H        | 6.16863        | 5.56744        | 1.98235        |
| Li   | 10.02415 | 2.53986  | 5.10539  | N    | 8.68410  | 8.73401  | 6.36212  | H        | 8.86922        | 9.39984        | 1.92748        |
| Li   | 5.01255  | 0.01892  | 0.02153  | N    | 6.35315  | 6.28944  | 6.38997  | H        | 5.55659        | 8.89813        | 8.39193        |
| Li   | 7.52684  | 2.49643  | 5.16260  | N    | 8.72575  | 6.37812  | 3.97974  | H        | 9.38877        | 6.18180        | 8.29992        |
| Li   | 5.05882  | 2.57034  | 2.56790  | N    | 6.28533  | 8.67537  | 4.00019  | H        | 8.66797        | 8.19766        | 7.24054        |
| Li   | 7.48422  | 0.04213  | 7.75751  | H    | 1.08901  | 0.63789  | 2.00870  | H        | 6.39650        | 6.93351        | 7.19084        |
| Li   | 5.01814  | 2.52186  | 0.08284  | H    | 3.85612  | 4.45503  | 2.01324  | H        | 7.87216        | 6.37270        | 3.40236        |
| Li   | 7.49676  | 0.07719  | 10.24065 | H    | 0.57726  | 3.90731  | 8.36592  | H        | 6.92501        | 8.72303        | 3.19656        |
| Li   | 7.53183  | 0.01748  | 5.23884  | H    | 4.44905  | 1.18027  | 8.40532  | H        | 7.08968        | 6.71007        | 1.33002        |
| Li   | 5.02559  | 2.51608  | 5.10001  | H    | 3.65529  | 3.07015  | 7.12414  | H        | 7.84374        | 8.44528        | 1.14977        |
| Li   | 10.01847 | 5.02624  | 10.32571 | H    | 1.36898  | 1.95744  | 7.15599  | H        | 6.70716        | 8.00434        | 9.06196        |
| Li   | 2.57641  | 7.49225  | 5.24798  | H    | 3.10459  | 1.50847  | 3.15274  | H        | 8.27585        | 7.05658        | 9.05626        |
| Li   | 9.57523  | 7.14726  | 2.26062  | H    | 1.89862  | 3.70728  | 3.17496  | H        | 9.55450        | 9.27224        | 6.44813        |
| Li   | 2.59596  | 5.00465  | 7.77728  | H    | 2.04352  | 1.70419  | 1.28218  | H        | 5.42585        | 5.86255        | 6.50150        |
| Li   | 10.02154 | 7.55569  | 10.27994 | H    | 2.96412  | 3.31703  | 1.31523  | H        | 9.07120        | 5.41468        | 3.88289        |
| Li   | 2.54023  | 4.99264  | 10.26764 | H    | 1.67601  | 2.96316  | 9.04899  | H        | 5.80719        | 9.58270        | 3.96893        |
| Li   | 2.53852  | 5.02787  | 5.22721  | H    | 3.32936  | 2.09517  | 9.09903  | <b>H</b> | <b>2.08925</b> | <b>9.46697</b> | <b>3.45623</b> |
| Li   | 9.83700  | 7.25915  | 5.38479  | H    | 4.59428  | 4.18367  | 6.44846  |          |                |                |                |
| Li   | 5.02706  | 5.02437  | 0.02667  | H    | 0.52488  | 0.80712  | 6.42049  |          |                |                |                |
| Li   | 7.45857  | 7.55720  | 5.22372  | H    | 4.27442  | 0.53983  | 3.68263  |          |                |                |                |
| Li   | 5.03649  | 7.52416  | 2.59592  | H    | 0.79566  | 4.61881  | 3.89817  |          |                |                |                |
| Li   | 7.49834  | 4.98661  | 7.79138  | H    | 6.16306  | 0.57588  | 1.99351  |          |                |                |                |
| Li   | 5.03684  | 7.53022  | 0.08773  | H    | 8.86863  | 4.44080  | 1.99774  |          |                |                |                |
| Li   | 7.51606  | 5.02850  | 10.27982 | H    | 5.57305  | 3.86667  | 8.39174  |          |                |                |                |
| Li   | 7.45480  | 4.97316  | 5.31171  | H    | 9.45850  | 1.14836  | 8.34220  |          |                |                |                |
| Li   | 5.02531  | 7.51467  | 5.11340  | H    | 8.65189  | 3.06028  | 7.16267  |          |                |                |                |
| N    | 1.12566  | 1.25351  | 1.18785  | H    | 6.36721  | 1.95160  | 7.12587  |          |                |                |                |
| N    | 3.86351  | 3.80302  | 1.21745  | H    | 8.14876  | 1.28082  | 3.18007  |          |                |                |                |
| N    | 1.25219  | 3.89418  | 9.14192  | H    | 6.98684  | 3.63969  | 3.20712  |          |                |                |                |
| N    | 3.77696  | 1.17494  | 9.18460  | H    | 7.08232  | 1.71187  | 1.33583  |          |                |                |                |
| N    | 3.66840  | 3.75023  | 6.35225  | H    | 7.95142  | 3.35667  | 1.25501  |          |                |                |                |
| N    | 1.42062  | 1.30498  | 6.36334  | H    | 6.69579  | 2.95089  | 9.08044  |          |                |                |                |
| N    | 3.71111  | 1.34901  | 3.96848  | H    | 8.36173  | 2.09692  | 9.02511  |          |                |                |                |
| N    | 1.25461  | 3.70403  | 3.97739  | H    | 9.55179  | 4.19660  | 6.47840  |          |                |                |                |
| N    | 6.17017  | 1.25384  | 1.21946  | H    | 5.45777  | 0.80891  | 6.46215  |          |                |                |                |
| N    | 8.87395  | 3.80366  | 1.19057  | H    | 9.32477  | 0.48520  | 3.92826  |          |                |                |                |
| N    | 6.24465  | 3.86896  | 9.17109  | H    | 5.85206  | 4.57842  | 3.84290  |          |                |                |                |
| N    | 8.79287  | 1.17023  | 9.12596  | H    | 1.29748  | 5.59271  | 1.95864  |          |                |                |                |
| N    | 8.64495  | 3.72691  | 6.37968  | H    | 3.89480  | 9.45228  | 2.00115  |          |                |                |                |
| N    | 6.36513  | 1.27613  | 6.34951  | H    | 0.63258  | 8.89136  | 8.32360  |          |                |                |                |
| N    | 8.78231  | 1.35434  | 3.98691  | H    | 4.48229  | 6.18374  | 8.39782  |          |                |                |                |
| N    | 6.30183  | 3.66475  | 3.97488  | H    | 3.59633  | 8.12142  | 7.20751  |          |                |                |                |
| N    | 1.09952  | 6.29424  | 1.23314  | H    | 1.35483  | 6.87918  | 7.22186  |          |                |                |                |
| N    | 3.88263  | 8.79877  | 1.20766  | H    | 3.15537  | 6.33699  | 3.16885  |          |                |                |                |
| N    | 1.25130  | 8.89511  | 9.14571  | H    | 1.52609  | 7.99223  | 3.05532  |          |                |                |                |
| N    | 3.80074  | 6.16582  | 9.16813  | H    | 1.99209  | 6.79271  | 1.14178  |          |                |                |                |
| N    | 3.69087  | 8.76310  | 6.40996  | H    | 2.97438  | 8.33359  | 1.31358  |          |                |                |                |
